# Supplementary material for: The simple maneuver to safely extend the anhepatic time to 30 minutes for rat liver transplantation
Source: Research Square preprint supplement (doi:10.21203/rs.3.rs-118171/v2), 2021-03-09
Supplement: Supplementary file 1 [file ca5cfc914332644c7f17d8b5.docx]

For the video 1,

The diaphragm was clamped regularly (like references) and the reconnection of the supra-hepatic vena cava was finished, the irregular respiratory occurred and the rats died when the diaphragm was de-clamped, the clamping was conducted like my description, it was better.

For the video 2

The rat respiratory was normal when clamping was performed like my study.
